# Supplementary material for: Cocreating injury prevention training for youth team handball: bridging theory and practice
Source: HighWire-hosted journal article supplement (doi:10.1136/bmjsem-2021-001263), 2022-04-01
Supplement: bmjsem-2021-001263supp002_data_supplement.pdf [file bmjsem-2021-001263supp002_data_supplement.pdf]

**Appendix 2.** Consensus on principles and examples of exercises from workshop with sports medicine experts.

| Principle                               | Example of exercises                                                                                          |
|-----------------------------------------|---------------------------------------------------------------------------------------------------------------|
| All-round training for physical fitness | Balance, coordination, functional tasks, flexibility exercises, aerobic training                              |
| Movement technique lower extremities    | Hip-knee-foot alignment during jumping/cutting/landing tasks                                                  |
| Movement technique upper extremities    | Throw backwards, sideways to train external rotation and unload front muscles of shoulder                     |
| Muscle strength                         | Shoulders, legs, core                                                                                         |
| Self-control/choice (players)*          | Players pick exercises they like from a bank of exercises                                                     |
|                                         | Players pick the type of feedback they like and when they need it                                             |
|                                         | Players pick the equipment they like to use in practice                                                       |
|                                         | Increased understanding of why to enhance positive expectancies                                               |
| External focus of attention             | Provide visual and verbal instructions and feedback to activate external focus of attention/implicit learning |
| Sport specificity/challenge             | Pressure elements, e.g., “you have 10 seconds for...”                                                         |
| Load-management                         | Education about healthy loading and importance of rest                                                        |

\*Self-determination theory (SDT)
