# Supplementary material for: Cocreating injury prevention training for youth team handball: bridging theory and practice
Source: HighWire-hosted journal article supplement (doi:10.1136/bmjsem-2021-001263), 2022-04-01
Supplement: bmjsem-2021-001263supp003_data_supplement.pdf [file bmjsem-2021-001263supp003_data_supplement.pdf]

**Appendix 3.** Consensus on aspect, perspectives and suggested focus areas from the workshop with sport psychology experts.

| Aspect                                                                                                                                                               | Perspective | Focus areas                                                                                                                                                                             |                                                                                         |
|----------------------------------------------------------------------------------------------------------------------------------------------------------------------|-------------|-----------------------------------------------------------------------------------------------------------------------------------------------------------------------------------------|-----------------------------------------------------------------------------------------|
| Stress levels are important antecedents of youth athletic injury. Increased levels of stress are associated with attentional disruption and increased muscle tension | Individual  | Self-reflection and self-awareness among players and coaches. For example, <i>“How do I feel today?”</i> , <i>“What makes me feel focused?”</i> , <i>“What makes me feel stressed?”</i> |                                                                                         |
|                                                                                                                                                                      |             | Interpersonal knowledge                                                                                                                                                                 |                                                                                         |
|                                                                                                                                                                      |             | Arousal regulation                                                                                                                                                                      |                                                                                         |
|                                                                                                                                                                      |             |                                                                                                                                                                                         | Mindfulness training                                                                    |
|                                                                                                                                                                      |             |                                                                                                                                                                                         | Psychoeducation (the importance of rest and recovery)                                   |
|                                                                                                                                                                      |             |                                                                                                                                                                                         | Motivation and goalsetting                                                              |
|                                                                                                                                                                      |             | Team                                                                                                                                                                                    | Open and supportive communication                                                       |
|                                                                                                                                                                      |             |                                                                                                                                                                                         | Social support and feedback                                                             |
|                                                                                                                                                                      |             |                                                                                                                                                                                         | Supportive motivational climate                                                         |
|                                                                                                                                                                      |             | Organization                                                                                                                                                                            | Involve the different organizational levels (club, regional and national organizations) |
|                                                                                                                                                                      |             |                                                                                                                                                                                         | Create conditions for long and sustainable careers – clarify educational responsibility |
